# Supplementary material for: Association between Fatty Acid Composition in Hair and Energy Availability during Early Lactation in Simmental and German Holstein Cows
Source: MDPI journal article supplement (doi:10.3390/metabo12121201), 2022-12-01
Supplement: s1 [file s1]

## Supplementary material

**Suppl. Table S1:** Composition of diets

| Feeding groups                            | Farm 1 (SIM) |         |         |         | Farm 2 (SIM) |         | Farm 3 (HOL) |         |         |         |
|-------------------------------------------|--------------|---------|---------|---------|--------------|---------|--------------|---------|---------|---------|
|                                           | 6.1/150      | 6.1/250 | 6.5/150 | 6.5/250 | 6.5/150      | 6.5/250 | 6.1/150      | 6.1/250 | 6.5/150 | 6.5/250 |
| Diet provided as                          | PMR          |         |         |         | PMR          |         | TMR          |         |         |         |
| Dry matter [g/kg]                         | 476          | 514     | 450     | 476     | 466          | 514     | 547          | 601     | 523     | 580     |
| Chemical composition [g/kg of dry matter] |              |         |         |         |              |         |              |         |         |         |
| Crude ash                                 | 64           | 65      | 64      | 65      | 71           | 70      | 66           | 65      | 67      | 65      |
| Crude protein                             | 148          | 159     | 153     | 158     | 158          | 159     | 129          | 138     | 135     | 142     |
| Crude fat                                 | 36           | 36      | 37      | 37      | 45           | 44      | 37           | 39      | 38      | 40      |
| Crude fibre                               | 208          | 190     | 183     | 177     | 177          | 167     | 205          | 184     | 188     | 173     |
| NDF om                                    | 417          | 387     | 377     | 368     | 377          | 362     | 404          | 366     | 372     | 345     |
| ADF om                                    | 251          | 234     | 223     | 217     | 222          | 212     | 241          | 221     | 221     | 207     |
| Energy [MJ/kg DM]                         |              |         |         |         |              |         |              |         |         |         |
| NE <sub>L</sub>                           | 6.6          | 6.8     | 6.8     | 6.9     | 6.8          | 6.8     | 6.7          | 7.1     | 6.9     | 7.2     |
| ME                                        | 10.8         | 11.1    | 11.2    | 11.3    | 11.1         | 11.1    | 11.0         | 11.5    | 11.3    | 11.7    |

Feeding groups: 6.1/150: 6.1 MJ NE<sub>L</sub> energy concentration of the roughage/kg DM and 150 g concentrate supply /kg ECM; 6.1/250: 6.1 MJ NE<sub>L</sub> energy concentration of the roughage/kg DM and 250 g concentrate supply /kg ECM; 6.5/150: 6.5 MJ NE<sub>L</sub> energy concentration of the roughage/kg DM and 150 g concentrate supply /kg ECM; 6.5/250: 6.5 MJ NE<sub>L</sub> energy concentration of the roughage/kg DM and 250 g concentrate supply /kg ECM;

Diets provided either as total mixed ration (TMR; roughage and concentrate mixed) or partial mixed ration (PMR; roughage and concentrate as separate components); NDF - Neutral detergent fibre; ADF - Acid detergent fibre; om - organic matter; NE<sub>L</sub> – net energy of lactation; ME – metabolizable energy  
Reference: Urh C. Denissen J. Harder I. Koch C. Gerster E. Ettle T. Kraus N. Schmitz R. Kuhla B. Stamer E. Spiekers H and Sauerwein H 2019.

Circulating adiponectin concentrations during the transition from pregnancy to lactation in high-yielding dairy cows: testing the effects of farm. parity. and dietary energy level in large animal numbers. Domestic Animal Endocrinology 69. 1-12

**Composition of reference standard mixture:**

- Even chain saturated fatty acids: C8:0, C10:0, C12:0, C14:0, C16:0, C18:0, C20:0, C22:0, C24:0, C26:0
- Odd chain saturated fatty acids: C11:0, C13:0, C15:0, C17:0, C21:0, C23:0
- Branched chain fatty acids: *iso*C13:0, *anteiso*C13:0, *iso*C14:0, *iso*C15:0, *anteiso*C15:0, *iso*C16:0
- Monounsaturated fatty acids: C14:1, C16:1, C17:1, C18:1*trans*-9, C18:1*trans*-11, C18:1*cis*-9, C18:1*cis*-11, C20:1, C22:1, C24:1
- Polyunsaturated fatty acids: C18:2*trans*, C18:2*n*-6, C18:3*n*-6, C18:3*n*-3, CLA*cis*-9, *trans*-11, C20:2*n*-6, C20:3*n*-6, C20:3*n*-3, C20:4*n*-6, C22:2*n*-6, C22:4*n*-6, C22:6*n*-3

**Suppl. Table S2:** Descriptive statistic of fatty acid composition (% of total fatty acids) of hair samples taken in weeks 4 and 8 of lactation in farm 1, 2 and 3 (mean +sd)

| Hair sample<br>n     | Farm 1 (SIM) |            | Farm 2 (SIM) |            | Farm 3 (HOL) |            |
|----------------------|--------------|------------|--------------|------------|--------------|------------|
|                      | week 4       | week 8     | week 4       | week 8     | week 4       | week 8     |
|                      | 44           | 62         | 37           | 59         | 36           | 55         |
| C10:0                | 5.85±0.93    | 6.06±1.3   | 5.25±1.01    | 5.45±1.02  | 9.02±4.44    | 6.41±1.91  |
| C12:0                | 4.48±0.59    | 4.77±0.69  | 3.96±0.67    | 4.38±0.61  | 4.02±0.79    | 4.08±0.59  |
| C14:0                | 31.06±4.32   | 31.01±5.39 | 28.48±5.2    | 28.91±3.87 | 26.22±5.44   | 24.15±3.83 |
| C16:0                | 22.57±1.96   | 22.2±1.78  | 22.30±2.6    | 20.64±1.98 | 21.49±2.20   | 22.29±1.79 |
| C18:0                | 12.29±1.66   | 12.37±1.98 | 12.84±1.82   | 12.75±1.47 | 13.29±1.69   | 15.37±2.14 |
| C20:0                | 2.80±0.49    | 2.78±0.62  | 3.66±0.65    | 3.26±0.57  | 2.38±0.29    | 2.33±0.29  |
| C22:0                | 1.47±0.19    | 1.50±0.21  | 1.64±0.20    | 1.64±0.26  | 1.95±0.27    | 1.88±0.19  |
| C24:0                | 2.34±0.30    | 2.24±0.32  | 2.43±0.46    | 2.62±0.44  | 2.63±0.50    | 2.55±0.35  |
| C26:0                | 0.54±0.10    | 0.52±0.09  | 0.83±0.19    | 0.85±0.18  | 0.49±0.11    | 0.51±0.09  |
| C13:0                | 0.28±0.05    | 0.26±0.04  | 0.22±0.04    | 0.23±0.04  | 0.30±0.07    | 0.31±0.05  |
| C15:0                | 0.76±0.09    | 0.74±0.09  | 0.70±0.13    | 0.70±0.11  | 0.89±0.14    | 0.98±0.13  |
| C17:0                | 0.75±0.11    | 0.74±0.13  | 1.10±0.17    | 1.06±0.13  | 0.68±0.10    | 0.75±0.10  |
| C21:0                | 0.20±0.04    | 0.20±0.04  | 0.23±0.03    | 0.23±0.04  | 0.21±0.03    | 0.23±0.03  |
| <i>iso</i> C14:0     | 0.32±0.15    | 0.29±0.11  | 0.36±0.24    | 0.38±0.16  | 0.37±0.09    | 0.38±0.10  |
| <i>anteiso</i> C15:0 | 0.23±0.05    | 0.24±0.05  | 0.20±0.05    | 0.23±0.08  | 0.25±0.05    | 0.34±0.10  |
| C16:1                | 0.77±0.13    | 0.78±0.20  | 0.79±0.19    | 0.76±0.17  | 0.71±0.09    | 0.81±0.14  |
| C18:1 <i>cis</i> -9  | 6.13±1.51    | 6.16±1.80  | 5.99±1.82    | 6.54±2.52  | 6.40±1.49    | 7.01±1.48  |
| C18:1 <i>cis</i> -11 | 2.77±0.67    | 2.67±0.71  | 3.04±0.76    | 2.75±0.57  | 2.50±0.68    | 2.75±0.56  |
| C20:1                | 0.76±0.19    | 0.75±0.21  | 0.94±0.24    | 0.94±0.24  | 0.55±0.15    | 0.56±0.12  |
| C22:1                | 0.21±0.05    | 0.22±0.06  | 0.27±0.06    | 0.27±0.07  | 0.22±0.05    | 0.24±0.05  |
| C18:2 <i>n</i> -6    | 2.55±0.82    | 2.91±0.84  | 3.34±1.01    | 4.32±1.20  | 3.69±0.56    | 4.36±0.81  |
| C18:3 <i>n</i> -3    | 0.31±0.14    | 0.32±0.12  | 0.43±0.19    | 0.49±0.19  | 0.47±0.13    | 0.52±0.13  |

**Suppl. Table S3:** Farm-specific effects of energy concentration of the roughage (R), amount of concentrate supply (C), lactation week (lwo), lactation number class (Lactation) on fatty acid composition (% of total fatty acids) of hair taken in week 8 of lactation

|              | Farm 1 (SIM)  |           |           |           |                  |       |              |              | Farm 2 (SIM)  |           |                  |              |
|--------------|---------------|-----------|-----------|-----------|------------------|-------|--------------|--------------|---------------|-----------|------------------|--------------|
|              | Feeding group |           |           |           | <i>p</i> -values |       |              |              | Feeding group |           | <i>p</i> -values |              |
|              | 6.1/150       | 6.1/250   | 6.5/150   | 6.5/250   | R                | C     | Lactation    | R×C          | 6.5/150       | 6.5/250   | C                | Lactation    |
| C10:0        | 5.5±0.35      | 6.2±0.32  | 6.1±0.31  | 5.8±0.32  | 0.686            | 0.564 | <b>0.009</b> | 0.142        | 5.4±0.2       | 5.6±0.21  | 0.486            | 0.295        |
| C12:0        | 4.7±0.18      | 4.9±0.18  | 4.8±0.17  | 4.4±0.19  | 0.388            | 0.634 | 0.254        | 0.074        | 4.4±0.12      | 4.4±0.13  | 0.687            | 0.166        |
| C14:0        | 30.4±1.45     | 31.6±1.36 | 30.7±1.33 | 29.6±1.39 | 0.530            | 0.996 | 0.067        | 0.392        | 28.7±0.72     | 29.3±0.80 | 0.507            | 0.066        |
| C16:0        | 22.9±0.50     | 21.9±0.45 | 21.7±0.45 | 22.9±0.49 | 0.776            | 0.906 | 0.303        | <b>0.022</b> | 20.8±0.38     | 20.0±0.41 | 0.143            | 0.444        |
| C18:0        | 12.7±0.54     | 12.3±0.55 | 12.5±0.52 | 12.6±0.52 | 0.934            | 0.733 | 0.136        | 0.628        | 12.8±0.28     | 12.6±0.31 | 0.682            | 0.146        |
| C20:0        | 2.8±0.17      | 2.8±0.16  | 2.8±0.16  | 2.9±0.16  | 0.971            | 0.690 | 0.172        | 0.820        | 3.3±0.10      | 3.1±0.11  | 0.468            | <b>0.015</b> |
| C22:0        | 1.5±0.06      | 1.6±0.06  | 1.5±0.05  | 1.4±0.06  | <b>0.019</b>     | 0.977 | 0.945        | 0.270        | 1.6±0.05      | 1.6±0.05  | 0.947            | 0.708        |
| C24:0        | 2.3±0.09      | 2.3±0.09  | 2.2±0.08  | 2.2±0.09  | 0.070            | 0.998 | 0.734        | 0.869        | 2.6±0.09      | 2.6±0.09  | 0.611            | 0.531        |
| C26:0        | 0.5±0.03      | 0.5±0.03  | 0.5±0.02  | 0.5±0.03  | 0.283            | 0.806 | 0.699        | 0.985        | 0.8±0.04      | 0.9±0.04  | 0.402            | 0.849        |
| C13:0        | 0.3±0.01      | 0.3±0.01  | 0.3±0.01  | 0.3±0.01  | 0.433            | 0.745 | 0.661        | 0.451        | 0.2±0.01      | 0.2±0.01  | 0.238            | 0.804        |
| C15:0        | 0.8±0.02      | 0.7±0.02  | 0.7±0.02  | 0.7±0.02  | 0.487            | 0.175 | <b>0.016</b> | 0.057        | 0.7±0.02      | 0.7±0.02  | 0.872            | 0.067        |
| C17:0        | 0.8±0.04      | 0.7±0.03  | 0.8±0.03  | 0.7±0.03  | 0.880            | 0.373 | <b>0.039</b> | 0.593        | 1.1±0.03      | 1.0±0.03  | 0.339            | 0.393        |
| C21:0        | 0.2±0.01      | 0.2±0.01  | 0.2±0.01  | 0.2±0.01  | 0.637            | 0.503 | 0.068        | 0.991        | 0.2±0.01      | 0.2±0.01  | 0.310            | 0.491        |
| isoC14:0     | 0.2±0.01      | 0.2±0.01  | 0.2±0.01  | 0.2±0.01  | 0.486            | 0.727 | 0.088        | 0.368        | 0.2±0.01      | 0.2±0.01  | 0.697            | 0.353        |
| anteisoC15:0 | 0.3±0.01      | 0.2±0.01  | 0.2±0.01  | 0.3±0.01  | 0.533            | 0.787 | <b>0.028</b> | <b>0.042</b> | 0.2±0.01      | 0.2±0.02  | 0.527            | 0.526        |
| C16:1        | 0.8±0.05      | 0.7±0.05  | 0.8±0.05  | 0.8±0.05  | 0.369            | 0.415 | 0.071        | 0.295        | 0.7±0.04      | 0.8±0.04  | 0.586            | 0.756        |
| C18:1cis-9   | 6.1±0.46      | 5.7±0.45  | 6.3±0.42  | 6.9±0.44  | 0.131            | 0.785 | <b>0.028</b> | 0.266        | 6.4±0.50      | 7.1±0.52  | 0.291            | 0.270        |
| C18:1cis-11  | 2.9±0.20      | 2.6±0.19  | 2.6±0.19  | 2.9±0.19  | 0.948            | 0.921 | 0.490        | 0.113        | 2.8±0.11      | 2.6±0.12  | 0.372            | 0.781        |
| C20:1        | 0.7±0.06      | 0.8±0.06  | 0.7±0.05  | 0.8±0.06  | 0.664            | 0.303 | 0.621        | 0.865        | 0.9±0.05      | 0.9±0.05  | 0.782            | 0.188        |
| C22:1        | 0.2±0.02      | 0.2±0.02  | 0.2±0.01  | 0.2±0.02  | 0.894            | 0.848 | 0.317        | 0.889        | 0.3±0.01      | 0.3±0.01  | 0.992            | 0.558        |
| C18:2-6      | 2.7±0.22      | 2.6±0.20  | 3.3±0.20  | 3.1±0.21  | <b>0.006</b>     | 0.532 | 0.161        | 0.698        | 4.5±0.24      | 4.3±0.25  | 0.722            | 0.681        |
| C18:3n-3     | 0.3±0.03      | 0.3±0.03  | 0.4±0.03  | 0.4±0.03  | <b>0.004</b>     | 0.565 | <b>0.037</b> | 0.710        | 0.5±0.04      | 0.5±0.04  | 0.418            | 0.967        |

Continued Suppl. Table S3

|              | Farm 3 (HOL)  |           |           |           | P-values |       |              |       |
|--------------|---------------|-----------|-----------|-----------|----------|-------|--------------|-------|
|              | Feeding group |           |           |           |          |       |              |       |
|              | 6.1/150       | 6.1/250   | 6.5/150   | 6.5/250   | R        | C     | Lactation    | R×C   |
| C10:0        | 6.2±0.59      | 6.4±0.53  | 6.9±0.51  | 6.3±0.54  | 0.547    | 0.745 | 0.266        | 0.431 |
| C12:0        | 4.0±0.17      | 4.1±0.16  | 4.0±0.16  | 4.1±0.15  | 0.891    | 0.456 | <b>0.017</b> | 0.789 |
| C14:0        | 23.4±1.13     | 24.4±1.04 | 24.8±1.00 | 23.6±1.05 | 0.753    | 0.912 | <b>0.046</b> | 0.336 |
| C16:0        | 22.3±0.55     | 22.4±0.5  | 22.2±0.48 | 22.6±0.53 | 0.938    | 0.616 | 0.190        | 0.750 |
| C18:0        | 15.3±0.63     | 15.4±0.63 | 15.5±0.60 | 15.4±0.59 | 0.885    | 0.973 | 0.119        | 0.814 |
| C20:0        | 2.4±0.09      | 2.3±0.08  | 2.4±0.08  | 2.3±0.08  | 0.856    | 0.417 | 0.150        | 0.844 |
| C22:0        | 1.9±0.06      | 1.8±0.06  | 1.9±0.05  | 1.9±0.05  | 0.542    | 0.533 | 0.992        | 0.651 |
| C24:0        | 2.5±0.11      | 2.5±0.10  | 2.6±0.09  | 2.5±0.10  | 0.624    | 0.465 | 0.127        | 0.509 |
| C26:0        | 0.5±0.03      | 0.5±0.02  | 0.5±0.02  | 0.5±0.02  | 0.760    | 0.691 | 0.208        | 0.428 |
| C13:0        | 0.3±0.02      | 0.3±0.02  | 0.3±0.01  | 0.3±0.02  | 0.965    | 0.978 | 0.145        | 0.596 |
| C15:0        | 1.0±0.04      | 1.0±0.04  | 1.0±0.04  | 1.0±0.04  | 0.484    | 0.652 | 0.681        | 0.956 |
| C17:0        | 0.8±0.03      | 0.8±0.03  | 0.8±0.03  | 0.7±0.03  | 0.450    | 0.682 | 0.117        | 0.695 |
| C21:0        | 0.2±0.01      | 0.2±0.01  | 0.2±0.01  | 0.2±0.01  | 0.748    | 0.790 | 0.715        | 0.848 |
| isoC14:0     | 0.2±0.01      | 0.2±0.01  | 0.2±0.01  | 0.2±0.01  | 0.127    | 0.894 | 0.494        | 0.803 |
| anteisoC15:0 | 0.3±0.03      | 0.4±0.03  | 0.3±0.03  | 0.3±0.03  | 0.927    | 0.619 | 0.611        | 0.893 |
| C16:1        | 0.9±0.04      | 0.8±0.04  | 0.8±0.03  | 0.8±0.04  | 0.406    | 0.903 | <b>0.001</b> | 0.083 |
| C18:1cis-9   | 7.0±0.45      | 7.6±0.41  | 6.5±0.39  | 7.1±0.40  | 0.265    | 0.163 | 0.269        | 0.976 |
| C18:1cis-11  | 2.8±0.17      | 2.9±0.16  | 2.6±0.14  | 2.8±0.15  | 0.295    | 0.370 | <b>0.033</b> | 0.985 |
| C20:1        | 0.6±0.04      | 0.6±0.03  | 0.6±0.03  | 0.5±0.03  | 0.861    | 0.417 | <b>0.040</b> | 0.584 |
| C22:1        | 0.3±0.01      | 0.2±0.01  | 0.2±0.01  | 0.2±0.01  | 0.125    | 0.413 | 0.423        | 0.873 |
| C18:2-6      | 4.3±0.24      | 4.2±0.23  | 4.3±0.22  | 4.6±0.23  | 0.426    | 0.758 | 0.506        | 0.383 |
| C18:3n-3     | 0.5±0.04      | 0.5±0.04  | 0.5±0.03  | 0.5±0.04  | 0.294    | 0.382 | 0.526        | 0.967 |

Feeding groups: 6.1/150: 6.1 MJ NE<sub>L</sub> energy concentration of the roughage/kg DM and 150 g concentrate supply /kg ECM; 6.1/250: 6.1 MJ NE<sub>L</sub> energy concentration of the roughage/kg DM and 250 g concentrate supply /kg ECM; 6.5/150: 6.5 MJ NE<sub>L</sub> energy concentration of the roughage/kg DM and 150 g concentrate supply /kg ECM; 6.5/250: 6.5 MJ NE<sub>L</sub> energy concentration of the roughage/kg DM and 250 g concentrate supply /kg ECM; Values presented as LS-means

**Suppl. Table S4:** Pearson correlation coefficients (*r*) and P-values (in brackets) between fatty acids (% of total fatty acids) of hair in week 4 and 8 and parameters of energy availability in week 2 to 6 on farm 1 (SIM)

|                  |                                                                           | Hair sample week 4 |        |       |        |       |        |       |        |       |        |                     |        |                   |        |                   |        |
|------------------|---------------------------------------------------------------------------|--------------------|--------|-------|--------|-------|--------|-------|--------|-------|--------|---------------------|--------|-------------------|--------|-------------------|--------|
| Lactation week 2 |                                                                           | C10:0              |        | C12:0 |        | C14:0 |        | C16:0 |        | C18:0 |        | C18:1 <i>cis</i> -9 |        | C18:2 <i>n</i> -6 |        | C18:3 <i>n</i> -3 |        |
|                  | Dry matter intake [kg DM]                                                 | 0.20               | (0.20) | 0.20  | (0.19) | 0.18  | (0.25) | -0.23 | (0.14) | -0.24 | (0.13) | -0.15               | (0.34) | 0.26              | (0.09) | 0.27              | (0.08) |
|                  | Energy intake [MJ NE <sub>L</sub> ]                                       | 0.18               | (0.25) | 0.19  | (0.23) | 0.17  | (0.28) | -0.19 | (0.22) | -0.25 | (0.10) | -0.13               | (0.40) | 0.27              | (0.08) | 0.26              | (0.10) |
|                  | Dry matter intake per metabolic BW [kg DM/ BW <sup>0.75</sup> ]           | 0.21               | (0.19) | 0.20  | (0.21) | 0.21  | (0.18) | -0.34 | (0.03) | -0.23 | (0.14) | -0.15               | (0.33) | 0.35              | (0.02) | 0.40              | (0.01) |
|                  | Energy intake per metabolic BW [MJ NE <sub>L</sub> / BW <sup>0.75</sup> ] | 0.20               | (0.21) | 0.19  | (0.24) | 0.21  | (0.18) | -0.31 | (0.04) | -0.26 | (0.10) | -0.14               | (0.36) | 0.37              | (0.02) | 0.39              | (0.01) |
|                  | Energy balance [MJ NE <sub>L</sub> ]                                      | -0.06              | (0.69) | 0.00  | (1.00) | -0.04 | (0.79) | -0.09 | (0.58) | 0.04  | (0.81) | -0.03               | (0.83) | 0.32              | (0.04) | 0.31              | (0.05) |
|                  | Maintenance [MJ NE <sub>L</sub> ]                                         | -0.09              | (0.59) | -0.06 | (0.70) | -0.15 | (0.34) | 0.25  | (0.11) | 0.01  | (0.95) | 0.14                | (0.37) | -0.09             | (0.56) | -0.14             | (0.38) |
|                  | Milk [MJ NE <sub>L</sub> ]                                                | 0.12               | (0.44) | 0.16  | (0.32) | 0.09  | (0.57) | -0.08 | (0.63) | -0.08 | (0.60) | -0.07               | (0.64) | -0.06             | (0.68) | -0.05             | (0.77) |
|                  | BCS                                                                       | -0.06              | (0.74) | 0.02  | (0.91) | -0.05 | (0.75) | 0.12  | (0.48) | -0.05 | (0.76) | 0.15                | (0.35) | 0.07              | (0.67) | 0.01              | (0.96) |
|                  | Delta body weight                                                         | -0.09              | (0.55) | -0.03 | (0.84) | -0.05 | (0.77) | 0.04  | (0.80) | 0.00  | (0.98) | 0.10                | (0.54) | 0.01              | (0.95) | 0.01              | (0.93) |
|                  | Delta BCS                                                                 | -0.04              | (0.84) | 0.07  | (0.73) | 0.01  | (0.96) | 0.07  | (0.69) | 0.06  | (0.76) | -0.18               | (0.34) | -0.04             | (0.84) | -0.11             | (0.55) |
|                  |                                                                           |                    |        |       |        |       |        |       |        |       |        |                     |        |                   |        |                   |        |
|                  |                                                                           | Hair sample week 8 |        |       |        |       |        |       |        |       |        |                     |        |                   |        |                   |        |
| Lactation week 2 |                                                                           | C10:0              |        | C12:0 |        | C14:0 |        | C16:0 |        | C18:0 |        | C18:1 <i>cis</i> -9 |        | C18:2 <i>n</i> -6 |        | C18:3 <i>n</i> -3 |        |
|                  | Dry matter intake [kg DM]                                                 | 0.01               | (0.95) | 0.16  | (0.25) | 0.06  | (0.67) | -0.03 | (0.84) | 0.03  | (0.84) | -0.21               | (0.11) | -0.09             | (0.50) | -0.06             | (0.68) |
|                  | Energy intake [MJ NE <sub>L</sub> ]                                       | 0.02               | (0.91) | 0.15  | (0.27) | 0.06  | (0.67) | -0.02 | (0.90) | 0.02  | (0.91) | -0.20               | (0.14) | -0.10             | (0.47) | -0.07             | (0.63) |
|                  | Dry matter intake per metabolic BW [kg DM/ BW <sup>0.75</sup> ]           | -0.06              | (0.67) | 0.09  | (0.54) | -0.01 | (0.97) | -0.08 | (0.54) | 0.06  | (0.64) | -0.12               | (0.39) | 0.04              | (0.74) | 0.08              | (0.54) |
|                  | Energy intake per metabolic BW [MJ NE <sub>L</sub> / BW <sup>0.75</sup> ] | -0.05              | (0.70) | 0.08  | (0.57) | 0.00  | (0.97) | -0.07 | (0.60) | 0.05  | (0.71) | -0.10               | (0.45) | 0.03              | (0.81) | 0.07              | (0.60) |
|                  | Energy balance [MJ NE <sub>L</sub> ]                                      | 0.05               | (0.70) | 0.03  | (0.84) | 0.04  | (0.77) | -0.13 | (0.35) | -0.03 | (0.80) | -0.07               | (0.61) | 0.08              | (0.55) | 0.12              | (0.37) |
|                  | Maintenance [MJ NE <sub>L</sub> ]                                         | -0.02              | (0.88) | 0.04  | (0.75) | 0.04  | (0.77) | 0.15  | (0.29) | -0.07 | (0.63) | -0.05               | (0.75) | -0.10             | (0.48) | -0.17             | (0.22) |
|                  | Milk [MJ NE <sub>L</sub> ]                                                | -0.13              | (0.35) | -0.07 | (0.59) | -0.07 | (0.61) | 0.15  | (0.27) | 0.13  | (0.34) | 0.06                | (0.67) | -0.21             | (0.12) | -0.15             | (0.27) |
|                  | BCS                                                                       | 0.09               | (0.53) | 0.14  | (0.34) | 0.03  | (0.85) | 0.05  | (0.73) | 0.02  | (0.87) | -0.09               | (0.51) | -0.31             | (0.03) | -0.30             | (0.04) |
|                  | Delta body weight                                                         | 0.10               | (0.46) | 0.19  | (0.18) | 0.15  | (0.26) | -0.03 | (0.83) | -0.19 | (0.16) | -0.17               | (0.21) | -0.05             | (0.72) | -0.08             | (0.58) |
|                  | Delta BCS                                                                 | 0.08               | (0.61) | -0.05 | (0.77) | 0.12  | (0.44) | -0.02 | (0.92) | -0.12 | (0.46) | -0.07               | (0.66) | 0.05              | (0.78) | -0.08             | (0.64) |
|                  |                                                                           |                    |        |       |        |       |        |       |        |       |        |                     |        |                   |        |                   |        |
| Lactation week 3 |                                                                           |                    |        |       |        |       |        |       |        |       |        |                     |        |                   |        |                   |        |
|                  | Dry matter intake [kg DM]                                                 | -0.05              | (0.74) | -0.07 | (0.62) | 0.02  | (0.86) | 0.10  | (0.49) | 0.02  | (0.86) | 0.03                | (0.82) | 0.08              | (0.58) | 0.00              | (0.99) |

|                                                                           |       |        |       |        |       |        |       |        |       |        |       |        |       |        |       |        |
|---------------------------------------------------------------------------|-------|--------|-------|--------|-------|--------|-------|--------|-------|--------|-------|--------|-------|--------|-------|--------|
| Energy intake [MJ NE <sub>L</sub> ]                                       | -0.09 | (0.51) | -0.09 | (0.52) | -0.03 | (0.84) | 0.15  | (0.30) | 0.06  | (0.65) | 0.07  | (0.59) | 0.08  | (0.57) | 0.01  | (0.96) |
| Dry matter intake per metabolic BW [kg DM/ BW <sup>0.75</sup> ]           | -0.07 | (0.61) | -0.10 | (0.50) | -0.01 | (0.97) | 0.05  | (0.73) | 0.04  | (0.77) | 0.09  | (0.53) | 0.22  | (0.11) | 0.13  | (0.34) |
| Energy intake per metabolic BW [MJ NE <sub>L</sub> / BW <sup>0.75</sup> ] | -0.12 | (0.37) | -0.12 | (0.39) | -0.06 | (0.65) | 0.11  | (0.45) | 0.09  | (0.53) | 0.14  | (0.33) | 0.21  | (0.11) | 0.14  | (0.31) |
| Energy balance [MJ NE <sub>L</sub> ]                                      | -0.02 | (0.91) | -0.14 | (0.34) | -0.15 | (0.29) | 0.07  | (0.63) | -0.05 | (0.73) | 0.09  | (0.52) | 0.27  | (0.05) | 0.20  | (0.15) |
| Maintenance [MJ NE <sub>L</sub> ]                                         | 0.11  | (0.43) | -0.01 | (0.95) | 0.08  | (0.58) | 0.04  | (0.79) | -0.12 | (0.40) | -0.08 | (0.59) | -0.14 | (0.32) | -0.25 | (0.07) |
| Milk [MJ NE <sub>L</sub> ]                                                | 0.04  | (0.78) | -0.04 | (0.79) | 0.14  | (0.30) | 0.11  | (0.45) | -0.01 | (0.97) | 0.03  | (0.81) | -0.25 | (0.06) | -0.22 | (0.10) |
| BCS                                                                       | 0.14  | (0.34) | 0.16  | (0.27) | 0.12  | (0.42) | 0.00  | (0.98) | -0.06 | (0.70) | -0.13 | (0.36) | -0.28 | (0.05) | -0.29 | (0.04) |
| Delta body weight                                                         | -0.09 | (0.49) | -0.27 | (0.06) | -0.01 | (0.95) | 0.07  | (0.64) | 0.09  | (0.53) | 0.04  | (0.78) | -0.04 | (0.75) | -0.07 | (0.62) |
| Delta BCS                                                                 | 0.18  | (0.23) | -0.04 | (0.81) | 0.12  | (0.42) | 0.00  | (0.98) | -0.29 | (0.05) | -0.03 | (0.83) | 0.07  | (0.61) | -0.08 | (0.61) |
| Lactation week 4                                                          |       |        |       |        |       |        |       |        |       |        |       |        |       |        |       |        |
| Dry matter intake [kg DM]                                                 | -0.12 | (0.40) | -0.11 | (0.44) | -0.02 | (0.91) | 0.13  | (0.35) | 0.07  | (0.61) | 0.11  | (0.44) | 0.22  | (0.12) | 0.14  | (0.34) |
| Energy intake [MJ NE <sub>L</sub> ]                                       | -0.10 | (0.50) | -0.08 | (0.60) | 0.04  | (0.81) | 0.14  | (0.34) | -0.01 | (0.95) | 0.13  | (0.36) | 0.27  | (0.05) | 0.18  | (0.20) |
| Dry matter intake per metabolic BW [kg DM/ BW <sup>0.75</sup> ]           | -0.13 | (0.37) | -0.10 | (0.49) | 0.00  | (0.99) | 0.07  | (0.65) | 0.02  | (0.89) | 0.15  | (0.31) | 0.37  | (0.01) | 0.24  | (0.09) |
| Energy intake per metabolic BW [MJ NE <sub>L</sub> / BW <sup>0.75</sup> ] | -0.11 | (0.46) | -0.08 | (0.58) | 0.04  | (0.81) | 0.07  | (0.63) | -0.02 | (0.89) | 0.16  | (0.28) | 0.37  | (0.01) | 0.25  | (0.07) |
| Energy balance [MJ NE <sub>L</sub> ]                                      | -0.19 | (0.20) | -0.17 | (0.26) | -0.24 | (0.09) | 0.25  | (0.09) | 0.04  | (0.77) | 0.26  | (0.07) | 0.45  | (0.00) | 0.39  | (0.01) |
| Maintenance [MJ NE <sub>L</sub> ]                                         | -0.04 | (0.76) | -0.07 | (0.62) | 0.03  | (0.86) | 0.10  | (0.50) | 0.00  | (0.98) | -0.01 | (0.92) | -0.07 | (0.62) | -0.10 | (0.46) |
| Milk [MJ NE <sub>L</sub> ]                                                | 0.19  | (0.19) | 0.12  | (0.42) | 0.24  | (0.09) | -0.07 | (0.65) | -0.09 | (0.53) | -0.14 | (0.31) | -0.24 | (0.09) | -0.31 | (0.03) |
| BCS                                                                       | 0.08  | (0.59) | 0.06  | (0.68) | 0.07  | (0.65) | 0.15  | (0.32) | -0.03 | (0.82) | -0.09 | (0.55) | -0.25 | (0.07) | -0.30 | (0.03) |
| Delta body weight                                                         | 0.18  | (0.20) | 0.24  | (0.09) | 0.00  | (0.99) | -0.21 | (0.15) | -0.09 | (0.54) | -0.02 | (0.88) | 0.10  | (0.48) | 0.15  | (0.28) |
| Delta BCS                                                                 | -0.05 | (0.76) | -0.26 | (0.08) | -0.02 | (0.89) | 0.28  | (0.06) | -0.12 | (0.43) | 0.03  | (0.85) | 0.05  | (0.73) | -0.01 | (0.97) |
| Lactation week 5                                                          |       |        |       |        |       |        |       |        |       |        |       |        |       |        |       |        |
| Dry matter intake [kg DM]                                                 | -0.21 | (0.12) | -0.12 | (0.38) | -0.12 | (0.38) | 0.24  | (0.07) | 0.12  | (0.37) | 0.22  | (0.09) | 0.23  | (0.08) | 0.29  | (0.02) |
| Energy intake [MJ NE <sub>L</sub> ]                                       | -0.23 | (0.08) | -0.12 | (0.38) | -0.12 | (0.38) | 0.25  | (0.06) | 0.12  | (0.37) | 0.21  | (0.10) | 0.19  | (0.15) | 0.23  | (0.07) |
| Dry matter intake per metabolic BW [kg DM/ BW <sup>0.75</sup> ]           | -0.33 | (0.01) | -0.18 | (0.17) | -0.23 | (0.09) | 0.17  | (0.20) | 0.22  | (0.11) | 0.29  | (0.03) | 0.27  | (0.04) | 0.33  | (0.01) |
| Energy intake per metabolic BW [MJ NE <sub>L</sub> / BW <sup>0.75</sup> ] | -0.33 | (0.01) | -0.17 | (0.21) | -0.23 | (0.10) | 0.20  | (0.13) | 0.19  | (0.15) | 0.31  | (0.02) | 0.26  | (0.05) | 0.32  | (0.01) |
| Energy balance [MJ NE <sub>L</sub> ]                                      | -0.06 | (0.66) | -0.05 | (0.71) | -0.11 | (0.43) | -0.06 | (0.67) | -0.12 | (0.37) | 0.19  | (0.16) | 0.32  | (0.01) | 0.39  | (0.00) |
| Maintenance [MJ NE <sub>L</sub> ]                                         | -0.01 | (0.92) | -0.05 | (0.71) | 0.09  | (0.53) | 0.12  | (0.39) | -0.09 | (0.52) | 0.01  | (0.96) | 0.11  | (0.42) | 0.00  | (0.99) |
| Milk [MJ NE <sub>L</sub> ]                                                | 0.06  | (0.67) | -0.02 | (0.90) | 0.11  | (0.40) | 0.16  | (0.25) | 0.09  | (0.51) | -0.07 | (0.61) | -0.27 | (0.04) | -0.25 | (0.06) |
| BCS                                                                       | 0.13  | (0.32) | 0.10  | (0.48) | 0.08  | (0.56) | 0.02  | (0.91) | -0.02 | (0.88) | -0.11 | (0.40) | -0.10 | (0.45) | -0.19 | (0.15) |
| Delta body weight                                                         | -0.03 | (0.85) | 0.05  | (0.71) | 0.02  | (0.86) | -0.06 | (0.67) | -0.20 | (0.14) | -0.05 | (0.72) | 0.24  | (0.07) | 0.22  | (0.10) |

|                                                                           |       |        |       |        |       |        |      |        |       |        |       |        |       |        |       |        |
|---------------------------------------------------------------------------|-------|--------|-------|--------|-------|--------|------|--------|-------|--------|-------|--------|-------|--------|-------|--------|
| Delta BCS                                                                 | 0.05  | (0.71) | -0.17 | (0.22) | -0.01 | (0.96) | 0.02 | (0.87) | -0.05 | (0.71) | 0.06  | (0.67) | 0.17  | (0.20) | 0.06  | (0.68) |
| <hr/>                                                                     |       |        |       |        |       |        |      |        |       |        |       |        |       |        |       |        |
| Lactation week 6                                                          |       |        |       |        |       |        |      |        |       |        |       |        |       |        |       |        |
| Dry matter intake [kg DM]                                                 | -0.05 | (0.70) | -0.10 | (0.47) | -0.14 | (0.30) | 0.17 | (0.22) | 0.04  | (0.79) | 0.09  | (0.49) | 0.30  | (0.02) | 0.27  | (0.04) |
| Energy intake [MJ NE <sub>L</sub> ]                                       | -0.09 | (0.50) | -0.07 | (0.60) | -0.14 | (0.29) | 0.24 | (0.08) | 0.01  | (0.94) | 0.11  | (0.41) | 0.25  | (0.06) | 0.24  | (0.08) |
| Dry matter intake per metabolic BW [kg DM/ BW <sup>0.75</sup> ]           | -0.09 | (0.50) | -0.17 | (0.22) | -0.14 | (0.28) | 0.12 | (0.37) | 0.07  | (0.63) | 0.07  | (0.62) | 0.13  | (0.34) | 0.05  | (0.72) |
| Energy intake per metabolic BW [MJ NE <sub>L</sub> / BW <sup>0.75</sup> ] | -0.19 | (0.16) | -0.17 | (0.21) | -0.21 | (0.12) | 0.18 | (0.19) | 0.12  | (0.39) | 0.18  | (0.17) | 0.18  | (0.17) | 0.20  | (0.15) |
| Energy balance [MJ NE <sub>L</sub> ]                                      | 0.00  | (0.98) | 0.01  | (0.92) | -0.04 | (0.75) | 0.16 | (0.24) | 0.02  | (0.86) | 0.01  | (0.92) | 0.18  | (0.19) | 0.19  | (0.17) |
| Maintenance [MJ NE <sub>L</sub> ]                                         | 0.07  | (0.61) | 0.03  | (0.84) | 0.07  | (0.60) | 0.05 | (0.73) | -0.08 | (0.54) | -0.05 | (0.69) | 0.03  | (0.82) | 0.03  | (0.81) |
| Milk [MJ NE <sub>L</sub> ]                                                | -0.02 | (0.86) | -0.04 | (0.79) | -0.05 | (0.70) | 0.04 | (0.78) | 0.07  | (0.61) | 0.05  | (0.73) | -0.04 | (0.76) | -0.10 | (0.44) |
| BCS                                                                       | 0.14  | (0.30) | 0.14  | (0.31) | 0.09  | (0.48) | 0.04 | (0.78) | 0.00  | (0.97) | -0.20 | (0.13) | -0.16 | (0.24) | -0.24 | (0.07) |
| Delta body weight                                                         | 0.00  | (0.99) | 0.02  | (0.91) | 0.03  | (0.82) | 0.04 | (0.75) | -0.11 | (0.44) | -0.03 | (0.80) | -0.08 | (0.57) | -0.05 | (0.70) |
| Delta BCS                                                                 | -0.03 | (0.82) | -0.08 | (0.54) | 0.00  | (0.98) | 0.10 | (0.45) | -0.07 | (0.61) | 0.06  | (0.63) | 0.10  | (0.46) | 0.20  | (0.13) |



**Suppl. Table S5:** Pearson correlation coefficients (*r*) and *p*-values (in brackets) between fatty acids (% of total fatty acids) of hair in week 4 and 8 and parameters of energy availability in week 2 to 6 on farm 2 (SIM)

|                                                                           |  | Hair sample week 4 |        |       |        |       |        |       |        |       |        |                     |        |                   |        |                   |        |
|---------------------------------------------------------------------------|--|--------------------|--------|-------|--------|-------|--------|-------|--------|-------|--------|---------------------|--------|-------------------|--------|-------------------|--------|
| Lactation week 2                                                          |  | C10:0              |        | C12:0 |        | C14:0 |        | C16:0 |        | C18:0 |        | C18:1 <i>cis</i> -9 |        | C18:2 <i>n</i> -6 |        | C18:3 <i>n</i> -3 |        |
| Dry matter intake [kg DM]                                                 |  | 0.31               | (0.07) | 0.31  | (0.07) | 0.33  | (0.05) | -0.46 | (0.00) | -0.29 | (0.08) | -0.10               | (0.55) | 0.18              | (0.30) | 0.21              | (0.22) |
| Energy intake [MJ NE <sub>L</sub> ]                                       |  | 0.27               | (0.10) | 0.28  | (0.10) | 0.30  | (0.07) | -0.43 | (0.01) | -0.27 | (0.11) | -0.07               | (0.69) | 0.23              | (0.17) | 0.26              | (0.12) |
| Dry matter intake per metabolic BW [kg DM/ BW <sup>0.75</sup> ]           |  | 0.22               | (0.20) | 0.21  | (0.22) | 0.21  | (0.22) | -0.37 | (0.03) | -0.16 | (0.35) | -0.04               | (0.83) | 0.28              | (0.10) | 0.30              | (0.08) |
| Energy intake per metabolic BW [MJ NE <sub>L</sub> / BW <sup>0.75</sup> ] |  | 0.16               | (0.33) | 0.20  | (0.24) | 0.18  | (0.28) | -0.36 | (0.03) | -0.17 | (0.33) | -0.01               | (0.95) | 0.34              | (0.04) | 0.33              | (0.05) |
| Energy balance [MJ NE <sub>L</sub> ]                                      |  | 0.21               | (0.23) | 0.11  | (0.54) | 0.10  | (0.55) | -0.13 | (0.44) | -0.06 | (0.72) | 0.03                | (0.85) | -0.06             | (0.71) | -0.11             | (0.51) |
| Maintenance [MJ NE <sub>L</sub> ]                                         |  | 0.18               | (0.31) | 0.13  | (0.47) | 0.21  | (0.22) | -0.12 | (0.48) | -0.29 | (0.10) | -0.07               | (0.70) | -0.13             | (0.46) | -0.12             | (0.51) |
| Milk [MJ NE <sub>L</sub> ]                                                |  | 0.22               | (0.21) | 0.33  | (0.05) | 0.27  | (0.11) | -0.33 | (0.05) | -0.35 | (0.04) | -0.16               | (0.35) | 0.35              | (0.03) | 0.34              | (0.04) |
| BCS                                                                       |  | -0.20              | (0.27) | -0.18 | (0.33) | -0.07 | (0.70) | 0.25  | (0.18) | 0.14  | (0.46) | -0.08               | (0.67) | -0.36             | (0.04) | -0.35             | (0.05) |
| Delta body weight                                                         |  | -0.03              | (0.89) | -0.06 | (0.74) | -0.06 | (0.77) | 0.13  | (0.49) | 0.18  | (0.36) | 0.01                | (0.96) | -0.25             | (0.19) | -0.32             | (0.09) |
| Delta BCS                                                                 |  | 0.14               | (0.47) | 0.13  | (0.49) | 0.20  | (0.30) | -0.15 | (0.44) | -0.15 | (0.44) | -0.15               | (0.43) | 0.05              | (0.80) | -0.11             | (0.59) |
|                                                                           |  |                    |        |       |        |       |        |       |        |       |        |                     |        |                   |        |                   |        |
|                                                                           |  | Hair sample week 8 |        |       |        |       |        |       |        |       |        |                     |        |                   |        |                   |        |
| Lactation week 2                                                          |  | C10:0              |        | C12:0 |        | C14:0 |        | C16:0 |        | C18:0 |        | C18:1 <i>cis</i> -9 |        | C18:2 <i>n</i> -6 |        | C18:3 <i>n</i> -3 |        |
| Dry matter intake [kg DM]                                                 |  | -0.07              | (0.67) | 0.12  | (0.46) | 0.12  | (0.45) | 0.00  | (0.98) | 0.13  | (0.43) | -0.25               | (0.12) | 0.26              | (0.10) | 0.45              | (0.00) |
| Energy intake [MJ NE <sub>L</sub> ]                                       |  | -0.05              | (0.78) | 0.16  | (0.33) | 0.17  | (0.29) | -0.03 | (0.84) | 0.11  | (0.49) | -0.31               | (0.05) | 0.27              | (0.09) | 0.46              | (0.00) |
| Dry matter intake per metabolic BW [kg DM/ BW <sup>0.75</sup> ]           |  | -0.07              | (0.68) | 0.15  | (0.35) | 0.15  | (0.36) | -0.06 | (0.72) | 0.19  | (0.25) | -0.37               | (0.02) | 0.26              | (0.10) | 0.41              | (0.01) |
| Energy intake per metabolic BW [MJ NE <sub>L</sub> / BW <sup>0.75</sup> ] |  | -0.06              | (0.71) | 0.20  | (0.20) | 0.16  | (0.30) | -0.07 | (0.66) | 0.16  | (0.32) | -0.37               | (0.02) | 0.29              | (0.06) | 0.45              | (0.00) |
| Energy balance [MJ NE <sub>L</sub> ]                                      |  | -0.01              | (0.93) | 0.13  | (0.45) | 0.01  | (0.94) | 0.18  | (0.27) | 0.17  | (0.30) | -0.16               | (0.32) | -0.17             | (0.31) | -0.06             | (0.73) |
| Maintenance [MJ NE <sub>L</sub> ]                                         |  | 0.17               | (0.30) | -0.07 | (0.70) | 0.04  | (0.80) | 0.11  | (0.49) | -0.12 | (0.47) | 0.12                | (0.46) | -0.23             | (0.17) | -0.12             | (0.45) |
| Milk [MJ NE <sub>L</sub> ]                                                |  | 0.05               | (0.74) | 0.18  | (0.27) | 0.17  | (0.29) | -0.26 | (0.11) | -0.17 | (0.28) | -0.25               | (0.11) | 0.36              | (0.02) | 0.30              | (0.06) |
| BCS                                                                       |  | 0.00               | (1.00) | -0.14 | (0.42) | 0.03  | (0.85) | -0.11 | (0.54) | -0.12 | (0.50) | 0.16                | (0.34) | -0.14             | (0.39) | -0.21             | (0.21) |
| Delta body weight                                                         |  | -0.21              | (0.27) | 0.02  | (0.94) | -0.04 | (0.84) | 0.17  | (0.35) | 0.09  | (0.61) | -0.07               | (0.72) | -0.18             | (0.32) | -0.33             | (0.06) |
| Delta BCS                                                                 |  | 0.03               | (0.85) | 0.14  | (0.46) | 0.10  | (0.58) | 0.06  | (0.74) | 0.10  | (0.58) | -0.35               | (0.05) | -0.14             | (0.46) | -0.08             | (0.68) |

Lactation week 3

|                                                                           |       |        |       |        |       |        |       |        |       |        |       |        |       |        |       |        |
|---------------------------------------------------------------------------|-------|--------|-------|--------|-------|--------|-------|--------|-------|--------|-------|--------|-------|--------|-------|--------|
| Dry matter intake [kg DM]                                                 | -0.03 | (0.86) | -0.11 | (0.51) | -0.13 | (0.43) | -0.03 | (0.86) | 0.10  | (0.52) | -0.01 | (0.95) | 0.37  | (0.02) | 0.46  | (0.00) |
| Energy intake [MJ NE <sub>L</sub> ]                                       | -0.04 | (0.82) | -0.12 | (0.46) | -0.11 | (0.50) | -0.02 | (0.92) | 0.08  | (0.61) | -0.01 | (0.96) | 0.36  | (0.02) | 0.43  | (0.00) |
| Dry matter intake per metabolic BW [kg DM/ BW <sup>0.75</sup> ]           | -0.01 | (0.94) | -0.10 | (0.55) | -0.07 | (0.66) | -0.09 | (0.59) | 0.18  | (0.26) | -0.12 | (0.44) | 0.37  | (0.02) | 0.45  | (0.00) |
| Energy intake per metabolic BW [MJ NE <sub>L</sub> / BW <sup>0.75</sup> ] | -0.04 | (0.82) | -0.12 | (0.44) | -0.07 | (0.67) | -0.04 | (0.82) | 0.16  | (0.30) | -0.10 | (0.52) | 0.39  | (0.01) | 0.45  | (0.00) |
| Energy balance [MJ NE <sub>L</sub> ]                                      | -0.30 | (0.06) | -0.27 | (0.09) | -0.22 | (0.18) | 0.16  | (0.32) | 0.39  | (0.01) | 0.11  | (0.52) | 0.03  | (0.87) | 0.08  | (0.62) |
| Maintenance [MJ NE <sub>L</sub> ]                                         | 0.08  | (0.62) | 0.12  | (0.47) | -0.09 | (0.57) | 0.03  | (0.83) | -0.16 | (0.33) | 0.30  | (0.06) | -0.21 | (0.19) | -0.13 | (0.40) |
| Milk [MJ NE <sub>L</sub> ]                                                | 0.34  | (0.03) | 0.29  | (0.07) | 0.23  | (0.14) | -0.34 | (0.03) | -0.32 | (0.04) | -0.36 | (0.02) | 0.20  | (0.21) | 0.22  | (0.17) |
| BCS                                                                       | -0.02 | (0.92) | -0.07 | (0.70) | 0.07  | (0.68) | -0.14 | (0.42) | -0.11 | (0.50) | 0.06  | (0.74) | -0.05 | (0.78) | -0.14 | (0.40) |
| Delta body weight                                                         | 0.10  | (0.53) | 0.20  | (0.22) | 0.25  | (0.12) | -0.15 | (0.35) | -0.02 | (0.90) | -0.39 | (0.01) | 0.08  | (0.63) | 0.10  | (0.53) |
| Delta BCS                                                                 | 0.29  | (0.09) | 0.35  | (0.05) | 0.22  | (0.21) | -0.17 | (0.34) | -0.18 | (0.30) | -0.09 | (0.59) | -0.06 | (0.75) | -0.14 | (0.41) |
| Lactation week 4                                                          |       |        |       |        |       |        |       |        |       |        |       |        |       |        |       |        |
| Dry matter intake [kg DM]                                                 | -0.06 | (0.66) | 0.03  | (0.84) | 0.02  | (0.90) | -0.25 | (0.09) | 0.01  | (0.97) | -0.20 | (0.17) | 0.28  | (0.05) | 0.41  | (0.00) |
| Energy intake [MJ NE <sub>L</sub> ]                                       | -0.10 | (0.50) | -0.02 | (0.90) | 0.00  | (0.99) | -0.20 | (0.17) | 0.01  | (0.94) | -0.15 | (0.30) | 0.28  | (0.05) | 0.39  | (0.00) |
| Dry matter intake per metabolic BW [kg DM/ BW <sup>0.75</sup> ]           | -0.14 | (0.33) | 0.01  | (0.95) | -0.02 | (0.88) | -0.06 | (0.70) | 0.17  | (0.23) | -0.27 | (0.05) | 0.31  | (0.03) | 0.37  | (0.01) |
| Energy intake per metabolic BW [MJ NE <sub>L</sub> / BW <sup>0.75</sup> ] | -0.15 | (0.30) | 0.04  | (0.81) | 0.00  | (0.98) | -0.06 | (0.66) | 0.18  | (0.19) | -0.27 | (0.05) | 0.33  | (0.02) | 0.39  | (0.00) |
| Energy balance [MJ NE <sub>L</sub> ]                                      | -0.27 | (0.06) | -0.04 | (0.77) | -0.12 | (0.40) | 0.29  | (0.04) | 0.26  | (0.06) | 0.04  | (0.80) | 0.10  | (0.50) | 0.09  | (0.54) |
| Maintenance [MJ NE <sub>L</sub> ]                                         | 0.09  | (0.54) | -0.09 | (0.55) | -0.05 | (0.75) | -0.04 | (0.80) | -0.18 | (0.22) | 0.21  | (0.16) | -0.05 | (0.75) | 0.03  | (0.82) |
| Milk [MJ NE <sub>L</sub> ]                                                | 0.21  | (0.15) | 0.11  | (0.46) | 0.17  | (0.25) | -0.39 | (0.00) | -0.19 | (0.19) | -0.22 | (0.12) | 0.16  | (0.27) | 0.23  | (0.10) |
| BCS                                                                       | -0.08 | (0.61) | -0.26 | (0.08) | -0.16 | (0.27) | 0.05  | (0.75) | 0.07  | (0.63) | 0.16  | (0.29) | -0.08 | (0.58) | -0.14 | (0.33) |
| Delta body weight                                                         | 0.28  | (0.05) | 0.24  | (0.10) | 0.27  | (0.06) | -0.22 | (0.13) | -0.08 | (0.59) | -0.24 | (0.09) | -0.15 | (0.31) | -0.06 | (0.66) |
| Delta BCS                                                                 | 0.03  | (0.83) | 0.12  | (0.42) | 0.00  | (0.98) | -0.06 | (0.72) | -0.02 | (0.88) | -0.11 | (0.45) | 0.03  | (0.86) | 0.06  | (0.70) |
| Lactation week 5                                                          |       |        |       |        |       |        |       |        |       |        |       |        |       |        |       |        |
| Dry matter intake [kg DM]                                                 | 0.04  | (0.78) | 0.08  | (0.60) | 0.13  | (0.37) | -0.15 | (0.29) | -0.04 | (0.78) | -0.27 | (0.05) | 0.36  | (0.01) | 0.43  | (0.00) |
| Energy intake [MJ NE <sub>L</sub> ]                                       | 0.06  | (0.69) | 0.03  | (0.85) | 0.11  | (0.46) | -0.11 | (0.43) | -0.05 | (0.73) | -0.16 | (0.27) | 0.37  | (0.01) | 0.45  | (0.00) |
| Dry matter intake per metabolic BW [kg DM/ BW <sup>0.75</sup> ]           | 0.06  | (0.66) | 0.17  | (0.24) | 0.14  | (0.34) | -0.13 | (0.37) | 0.07  | (0.63) | -0.33 | (0.02) | 0.33  | (0.02) | 0.39  | (0.00) |
| Energy intake per metabolic BW [MJ NE <sub>L</sub> / BW <sup>0.75</sup> ] | 0.07  | (0.64) | 0.14  | (0.32) | 0.11  | (0.45) | -0.11 | (0.44) | 0.07  | (0.61) | -0.30 | (0.03) | 0.31  | (0.02) | 0.38  | (0.00) |
| Energy balance [MJ NE <sub>L</sub> ]                                      | -0.08 | (0.57) | 0.25  | (0.08) | 0.15  | (0.30) | 0.12  | (0.40) | -0.07 | (0.63) | -0.17 | (0.22) | 0.07  | (0.61) | 0.09  | (0.52) |
| Maintenance [MJ NE <sub>L</sub> ]                                         | 0.13  | (0.35) | -0.05 | (0.71) | 0.05  | (0.74) | -0.04 | (0.76) | -0.22 | (0.13) | 0.19  | (0.17) | 0.03  | (0.83) | 0.12  | (0.39) |
| Milk [MJ NE <sub>L</sub> ]                                                | 0.18  | (0.20) | 0.07  | (0.63) | 0.16  | (0.26) | -0.38 | (0.00) | -0.09 | (0.50) | -0.19 | (0.17) | 0.34  | (0.01) | 0.39  | (0.00) |
| BCS                                                                       | -0.15 | (0.28) | -0.25 | (0.07) | -0.20 | (0.16) | 0.20  | (0.15) | 0.09  | (0.50) | 0.16  | (0.25) | -0.10 | (0.45) | -0.17 | (0.22) |

|                                                                           |       |        |       |        |       |        |       |        |       |        |       |        |       |        |       |        |
|---------------------------------------------------------------------------|-------|--------|-------|--------|-------|--------|-------|--------|-------|--------|-------|--------|-------|--------|-------|--------|
| Delta body weight                                                         | 0.24  | (0.09) | 0.22  | (0.12) | 0.15  | (0.30) | 0.08  | (0.57) | -0.12 | (0.41) | -0.08 | (0.57) | 0.08  | (0.57) | 0.10  | (0.45) |
| Delta BCS                                                                 | -0.09 | (0.55) | 0.07  | (0.63) | 0.04  | (0.81) | 0.17  | (0.24) | 0.01  | (0.97) | -0.03 | (0.86) | -0.06 | (0.67) | -0.05 | (0.71) |
| <hr/>                                                                     |       |        |       |        |       |        |       |        |       |        |       |        |       |        |       |        |
| Lactation week 6                                                          |       |        |       |        |       |        |       |        |       |        |       |        |       |        |       |        |
| Dry matter intake [kg DM]                                                 | -0.04 | (0.80) | -0.07 | (0.63) | 0.08  | (0.58) | -0.18 | (0.19) | -0.02 | (0.91) | -0.14 | (0.32) | 0.42  | (0.00) | 0.47  | (0.00) |
| Energy intake [MJ NE <sub>L</sub> ]                                       | 0.00  | (1.00) | -0.06 | (0.70) | 0.08  | (0.56) | -0.20 | (0.14) | -0.03 | (0.82) | -0.13 | (0.34) | 0.41  | (0.00) | 0.47  | (0.00) |
| Dry matter intake per metabolic BW [kg DM/ BW <sup>0.75</sup> ]           | -0.04 | (0.75) | -0.02 | (0.90) | 0.03  | (0.83) | -0.11 | (0.41) | 0.09  | (0.49) | -0.20 | (0.15) | 0.34  | (0.01) | 0.36  | (0.01) |
| Energy intake per metabolic BW [MJ NE <sub>L</sub> / BW <sup>0.75</sup> ] | 0.00  | (1.00) | 0.00  | (0.99) | 0.04  | (0.80) | -0.14 | (0.31) | 0.08  | (0.58) | -0.19 | (0.16) | 0.33  | (0.01) | 0.35  | (0.01) |
| Energy balance [MJ NE <sub>L</sub> ]                                      | 0.00  | (0.99) | 0.17  | (0.22) | 0.07  | (0.61) | 0.11  | (0.45) | -0.01 | (0.92) | 0.01  | (0.94) | 0.00  | (1.00) | -0.02 | (0.88) |
| Maintenance [MJ NE <sub>L</sub> ]                                         | 0.15  | (0.28) | -0.06 | (0.69) | 0.05  | (0.74) | -0.02 | (0.86) | -0.20 | (0.16) | 0.20  | (0.15) | 0.02  | (0.87) | 0.12  | (0.40) |
| Milk [MJ NE <sub>L</sub> ]                                                | 0.12  | (0.38) | 0.06  | (0.69) | 0.14  | (0.30) | -0.35 | (0.01) | -0.12 | (0.38) | -0.21 | (0.13) | 0.36  | (0.01) | 0.39  | (0.00) |
| BCS                                                                       | -0.18 | (0.21) | -0.23 | (0.11) | -0.18 | (0.19) | 0.13  | (0.35) | 0.02  | (0.88) | 0.21  | (0.12) | -0.10 | (0.47) | -0.22 | (0.12) |
| Delta body weight                                                         | 0.09  | (0.54) | 0.04  | (0.75) | -0.01 | (0.95) | 0.07  | (0.60) | 0.26  | (0.06) | -0.01 | (0.96) | -0.20 | (0.15) | -0.15 | (0.27) |
| Delta BCS                                                                 | 0.01  | (0.94) | 0.11  | (0.44) | 0.13  | (0.35) | -0.06 | (0.65) | -0.21 | (0.12) | 0.13  | (0.33) | 0.00  | (0.99) | -0.05 | (0.71) |

**Suppl. Table S6:** Pearson correlation coefficients (*r*) and *p*-values (in brackets) between fatty acids (% of total fatty acids) of hair in week 4 and 8 and parameters of energy availability in week 2 to 6 on farm 3 (HOL)

| Lactation week 2                                                          | Hair sample week 4 |        |       |        |       |        |       |        |       |        |                     |        |                   |        |                   |        |
|---------------------------------------------------------------------------|--------------------|--------|-------|--------|-------|--------|-------|--------|-------|--------|---------------------|--------|-------------------|--------|-------------------|--------|
|                                                                           | C10:0              |        | C12:0 |        | C14:0 |        | C16:0 |        | C18:0 |        | C18:1 <i>cis</i> -9 |        | C18:2 <i>n</i> -6 |        | C18:3 <i>n</i> -3 |        |
| Dry matter intake [kg DM]                                                 | -0.36              | (0.03) | -0.03 | (0.88) | 0.09  | (0.60) | 0.23  | (0.17) | 0.32  | (0.06) | 0.08                | (0.66) | 0.13              | (0.44) | 0.12              | (0.50) |
| Energy intake [MJ NE <sub>L</sub> ]                                       | -0.36              | (0.03) | -0.01 | (0.94) | 0.10  | (0.56) | 0.22  | (0.19) | 0.31  | (0.07) | 0.07                | (0.69) | 0.15              | (0.39) | 0.12              | (0.48) |
| Dry matter intake per metabolic BW [kg DM/ BW <sup>0.75</sup> ]           | -0.30              | (0.07) | -0.03 | (0.88) | 0.03  | (0.86) | 0.20  | (0.24) | 0.32  | (0.06) | 0.11                | (0.53) | 0.30              | (0.08) | 0.24              | (0.17) |
| Energy intake per metabolic BW [MJ NE <sub>L</sub> / BW <sup>0.75</sup> ] | -0.30              | (0.08) | -0.01 | (0.96) | 0.03  | (0.88) | 0.19  | (0.28) | 0.36  | (0.04) | 0.08                | (0.64) | 0.28              | (0.10) | 0.21              | (0.23) |
| Energy balance [MJ NE <sub>L</sub> ]                                      | -0.30              | (0.07) | 0.10  | (0.56) | 0.15  | (0.38) | 0.09  | (0.62) | 0.15  | (0.39) | -0.01               | (0.97) | 0.21              | (0.23) | 0.21              | (0.22) |
| Maintenance [MJ NE <sub>L</sub> ]                                         | -0.17              | (0.34) | -0.18 | (0.30) | -0.06 | (0.73) | 0.33  | (0.06) | 0.18  | (0.31) | 0.16                | (0.37) | -0.23             | (0.19) | -0.22             | (0.21) |
| Milk [MJ NE <sub>L</sub> ]                                                | -0.01              | (0.94) | 0.04  | (0.83) | 0.01  | (0.96) | 0.00  | (1.00) | 0.02  | (0.91) | -0.03               | (0.87) | 0.10              | (0.55) | -0.01             | (0.95) |
| BCS                                                                       | -0.06              | (0.74) | -0.14 | (0.41) | -0.05 | (0.78) | 0.18  | (0.30) | 0.10  | (0.57) | 0.11                | (0.51) | -0.26             | (0.12) | -0.31             | (0.07) |
| Delta body weight                                                         | -0.06              | (0.74) | -0.18 | (0.32) | -0.12 | (0.49) | 0.09  | (0.62) | 0.27  | (0.13) | 0.17                | (0.35) | 0.13              | (0.46) | 0.10              | (0.56) |
| Delta BCS                                                                 | -0.09              | (0.59) | -0.16 | (0.37) | -0.13 | (0.47) | 0.28  | (0.10) | 0.21  | (0.22) | 0.15                | (0.40) | -0.22             | (0.20) | -0.19             | (0.28) |

| Lactation week 2                                                          | Hair sample week 8 |        |       |        |       |        |       |        |       |        |                     |        |                   |        |                   |        |
|---------------------------------------------------------------------------|--------------------|--------|-------|--------|-------|--------|-------|--------|-------|--------|---------------------|--------|-------------------|--------|-------------------|--------|
|                                                                           | C10:0              |        | C12:0 |        | C14:0 |        | C16:0 |        | C18:0 |        | C18:1 <i>cis</i> -9 |        | C18:2 <i>n</i> -6 |        | C18:3 <i>n</i> -3 |        |
| Dry matter intake [kg DM]                                                 | -0.03              | (0.83) | -0.20 | (0.15) | -0.18 | (0.20) | 0.26  | (0.07) | 0.23  | (0.10) | 0.13                | (0.34) | -0.08             | (0.55) | -0.03             | (0.84) |
| Energy intake [MJ NE <sub>L</sub> ]                                       | -0.04              | (0.80) | -0.18 | (0.20) | -0.12 | (0.39) | 0.24  | (0.10) | 0.19  | (0.18) | 0.10                | (0.48) | -0.10             | (0.48) | -0.08             | (0.58) |
| Dry matter intake per metabolic BW [kg DM/ BW <sup>0.75</sup> ]           | 0.04               | (0.77) | -0.09 | (0.55) | -0.10 | (0.46) | 0.14  | (0.34) | 0.00  | (1.00) | 0.04                | (0.77) | 0.06              | (0.69) | 0.01              | (0.95) |
| Energy intake per metabolic BW [MJ NE <sub>L</sub> / BW <sup>0.75</sup> ] | 0.06               | (0.68) | -0.05 | (0.74) | -0.07 | (0.60) | 0.11  | (0.47) | -0.03 | (0.86) | 0.01                | (0.95) | 0.05              | (0.73) | -0.01             | (0.93) |
| Energy balance [MJ NE <sub>L</sub> ]                                      | -0.04              | (0.78) | -0.01 | (0.92) | -0.08 | (0.57) | 0.03  | (0.82) | 0.03  | (0.86) | -0.12               | (0.41) | 0.00              | (0.99) | 0.04              | (0.76) |
| Maintenance [MJ NE <sub>L</sub> ]                                         | -0.15              | (0.31) | -0.34 | (0.01) | -0.24 | (0.10) | 0.21  | (0.15) | 0.36  | (0.01) | 0.27                | (0.06) | -0.28             | (0.04) | -0.16             | (0.28) |
| Milk [MJ NE <sub>L</sub> ]                                                | -0.01              | (0.93) | -0.04 | (0.79) | 0.02  | (0.86) | 0.10  | (0.50) | 0.15  | (0.29) | 0.11                | (0.42) | 0.04              | (0.77) | 0.03              | (0.83) |
| BCS                                                                       | -0.04              | (0.76) | -0.30 | (0.03) | -0.28 | (0.05) | 0.08  | (0.58) | 0.28  | (0.04) | 0.23                | (0.10) | -0.17             | (0.21) | -0.11             | (0.45) |
| Delta body weight                                                         | -0.01              | (0.96) | -0.16 | (0.28) | -0.13 | (0.36) | 0.00  | (1.00) | 0.10  | (0.51) | 0.10                | (0.51) | -0.03             | (0.84) | 0.02              | (0.91) |
| Delta BCS                                                                 | 0.00               | (0.97) | -0.20 | (0.16) | -0.20 | (0.16) | 0.20  | (0.16) | 0.31  | (0.03) | 0.18                | (0.20) | -0.15             | (0.28) | -0.12             | (0.38) |

Lactation week 3

|                                                                           |       |        |       |        |       |        |       |        |       |        |       |        |       |        |       |        |
|---------------------------------------------------------------------------|-------|--------|-------|--------|-------|--------|-------|--------|-------|--------|-------|--------|-------|--------|-------|--------|
| Dry matter intake [kg DM]                                                 | 0.02  | (0.92) | -0.16 | (0.28) | -0.06 | (0.68) | 0.26  | (0.08) | 0.05  | (0.74) | 0.09  | (0.53) | -0.10 | (0.51) | -0.09 | (0.54) |
| Energy intake [MJ NE <sub>L</sub> ]                                       | 0.07  | (0.61) | -0.03 | (0.85) | 0.05  | (0.74) | 0.16  | (0.28) | 0.02  | (0.88) | 0.00  | (0.98) | -0.11 | (0.45) | -0.15 | (0.32) |
| Dry matter intake per metabolic BW [kg DM/ BW <sup>0.75</sup> ]           | 0.05  | (0.75) | 0.12  | (0.42) | 0.11  | (0.47) | 0.08  | (0.57) | -0.03 | (0.85) | -0.17 | (0.24) | 0.08  | (0.57) | 0.03  | (0.82) |
| Energy intake per metabolic BW [MJ NE <sub>L</sub> / BW <sup>0.75</sup> ] | 0.13  | (0.38) | 0.15  | (0.31) | 0.10  | (0.49) | 0.01  | (0.94) | -0.16 | (0.28) | -0.13 | (0.37) | 0.08  | (0.60) | 0.01  | (0.92) |
| Energy balance [MJ NE <sub>L</sub> ]                                      | 0.03  | (0.85) | 0.12  | (0.41) | 0.07  | (0.65) | -0.08 | (0.60) | -0.14 | (0.34) | -0.18 | (0.22) | 0.16  | (0.25) | 0.12  | (0.43) |
| Maintenance [MJ NE <sub>L</sub> ]                                         | -0.05 | (0.75) | -0.40 | (0.00) | -0.31 | (0.03) | 0.20  | (0.18) | 0.36  | (0.01) | 0.37  | (0.01) | -0.23 | (0.10) | -0.09 | (0.51) |
| Milk [MJ NE <sub>L</sub> ]                                                | -0.01 | (0.93) | -0.10 | (0.50) | -0.04 | (0.79) | 0.22  | (0.13) | 0.20  | (0.15) | 0.17  | (0.23) | -0.19 | (0.18) | -0.14 | (0.32) |
| BCS                                                                       | -0.08 | (0.57) | -0.32 | (0.02) | -0.28 | (0.05) | 0.12  | (0.41) | 0.30  | (0.03) | 0.24  | (0.08) | -0.22 | (0.12) | -0.16 | (0.27) |
| Delta body weight                                                         | 0.16  | (0.27) | 0.11  | (0.44) | 0.10  | (0.49) | -0.25 | (0.08) | -0.12 | (0.41) | -0.04 | (0.78) | 0.46  | (0.00) | 0.21  | (0.14) |
| Delta BCS                                                                 | -0.10 | (0.48) | 0.09  | (0.55) | 0.15  | (0.28) | -0.04 | (0.81) | -0.18 | (0.21) | -0.06 | (0.69) | 0.03  | (0.82) | -0.10 | (0.49) |
| Lactation week 4                                                          |       |        |       |        |       |        |       |        |       |        |       |        |       |        |       |        |
| Dry matter intake [kg DM]                                                 | 0.16  | (0.26) | 0.00  | (1.00) | -0.02 | (0.92) | 0.00  | (1.00) | 0.01  | (0.96) | 0.02  | (0.91) | 0.12  | (0.41) | 0.03  | (0.81) |
| Energy intake [MJ NE <sub>L</sub> ]                                       | 0.16  | (0.27) | 0.00  | (1.00) | -0.01 | (0.94) | 0.00  | (1.00) | 0.01  | (0.92) | 0.02  | (0.92) | 0.12  | (0.42) | 0.03  | (0.83) |
| Dry matter intake per metabolic BW [kg DM/ BW <sup>0.75</sup> ]           | 0.26  | (0.07) | 0.21  | (0.15) | 0.11  | (0.46) | -0.15 | (0.29) | -0.26 | (0.06) | -0.16 | (0.26) | 0.26  | (0.07) | 0.14  | (0.35) |
| Energy intake per metabolic BW [MJ NE <sub>L</sub> / BW <sup>0.75</sup> ] | 0.25  | (0.08) | 0.21  | (0.14) | 0.11  | (0.43) | -0.15 | (0.31) | -0.26 | (0.06) | -0.17 | (0.23) | 0.27  | (0.06) | 0.15  | (0.30) |
| Energy balance [MJ NE <sub>L</sub> ]                                      | 0.18  | (0.21) | 0.22  | (0.12) | 0.06  | (0.69) | -0.22 | (0.13) | -0.32 | (0.02) | -0.25 | (0.08) | 0.17  | (0.23) | 0.04  | (0.78) |
| Maintenance [MJ NE <sub>L</sub> ]                                         | -0.13 | (0.36) | -0.42 | (0.00) | -0.30 | (0.04) | 0.20  | (0.16) | 0.38  | (0.01) | 0.39  | (0.01) | -0.21 | (0.15) | -0.09 | (0.55) |
| Milk [MJ NE <sub>L</sub> ]                                                | 0.07  | (0.64) | -0.15 | (0.31) | -0.02 | (0.91) | 0.13  | (0.37) | 0.22  | (0.14) | 0.22  | (0.14) | -0.09 | (0.53) | -0.09 | (0.55) |
| BCS                                                                       | -0.11 | (0.43) | -0.31 | (0.03) | -0.26 | (0.07) | 0.14  | (0.34) | 0.33  | (0.02) | 0.24  | (0.09) | -0.24 | (0.10) | -0.17 | (0.23) |
| Delta body weight                                                         | -0.18 | (0.22) | 0.09  | (0.52) | 0.23  | (0.11) | -0.14 | (0.35) | 0.01  | (0.95) | -0.06 | (0.66) | 0.20  | (0.16) | 0.06  | (0.70) |
| Delta BCS                                                                 | -0.09 | (0.54) | 0.08  | (0.60) | 0.14  | (0.33) | -0.03 | (0.82) | -0.21 | (0.14) | -0.04 | (0.80) | 0.04  | (0.79) | -0.02 | (0.87) |
| Lactation week 5                                                          |       |        |       |        |       |        |       |        |       |        |       |        |       |        |       |        |
| Dry matter intake [kg DM]                                                 | 0.23  | (0.10) | -0.10 | (0.50) | -0.05 | (0.72) | 0.01  | (0.95) | 0.12  | (0.42) | 0.04  | (0.79) | 0.06  | (0.68) | 0.00  | (0.97) |
| Energy intake [MJ NE <sub>L</sub> ]                                       | 0.25  | (0.08) | -0.13 | (0.37) | -0.09 | (0.54) | 0.01  | (0.93) | 0.01  | (0.92) | 0.10  | (0.47) | 0.08  | (0.58) | 0.03  | (0.84) |
| Dry matter intake per metabolic BW [kg DM/ BW <sup>0.75</sup> ]           | 0.34  | (0.02) | 0.13  | (0.36) | 0.10  | (0.51) | -0.16 | (0.28) | -0.16 | (0.26) | -0.18 | (0.22) | 0.18  | (0.20) | 0.07  | (0.61) |
| Energy intake per metabolic BW [MJ NE <sub>L</sub> / BW <sup>0.75</sup> ] | 0.37  | (0.01) | 0.10  | (0.50) | 0.05  | (0.75) | -0.16 | (0.26) | -0.22 | (0.13) | -0.10 | (0.49) | 0.21  | (0.13) | 0.09  | (0.54) |
| Energy balance [MJ NE <sub>L</sub> ]                                      | 0.03  | (0.82) | 0.05  | (0.71) | 0.04  | (0.77) | -0.13 | (0.37) | -0.03 | (0.81) | -0.18 | (0.21) | 0.04  | (0.76) | -0.01 | (0.94) |
| Maintenance [MJ NE <sub>L</sub> ]                                         | -0.15 | (0.28) | -0.43 | (0.00) | -0.31 | (0.03) | 0.23  | (0.11) | 0.32  | (0.02) | 0.42  | (0.00) | -0.23 | (0.10) | -0.10 | (0.48) |
| Milk [MJ NE <sub>L</sub> ]                                                | 0.20  | (0.16) | -0.06 | (0.68) | -0.02 | (0.86) | 0.07  | (0.64) | 0.12  | (0.41) | 0.15  | (0.31) | 0.04  | (0.80) | 0.01  | (0.96) |
| BCS                                                                       | -0.16 | (0.28) | -0.29 | (0.04) | -0.24 | (0.09) | 0.12  | (0.43) | 0.27  | (0.06) | 0.25  | (0.09) | -0.12 | (0.41) | -0.08 | (0.59) |

|                                                                           |       |        |       |        |       |        |       |        |       |        |       |        |       |        |       |        |
|---------------------------------------------------------------------------|-------|--------|-------|--------|-------|--------|-------|--------|-------|--------|-------|--------|-------|--------|-------|--------|
| Delta body weight                                                         | 0.09  | (0.53) | 0.06  | (0.69) | 0.09  | (0.51) | 0.01  | (0.94) | -0.07 | (0.65) | -0.13 | (0.37) | 0.00  | (0.99) | 0.02  | (0.87) |
| Delta BCS                                                                 | 0.13  | (0.38) | 0.15  | (0.31) | 0.13  | (0.39) | -0.12 | (0.43) | 0.00  | (0.98) | -0.06 | (0.68) | 0.07  | (0.61) | 0.05  | (0.75) |
| <hr/>                                                                     |       |        |       |        |       |        |       |        |       |        |       |        |       |        |       |        |
| Lactation week 6                                                          |       |        |       |        |       |        |       |        |       |        |       |        |       |        |       |        |
| Dry matter intake [kg DM]                                                 | 0.04  | (0.79) | -0.04 | (0.75) | 0.03  | (0.82) | 0.00  | (0.98) | -0.03 | (0.82) | 0.09  | (0.51) | 0.19  | (0.17) | 0.18  | (0.20) |
| Energy intake [MJ NE <sub>L</sub> ]                                       | 0.10  | (0.46) | -0.11 | (0.42) | -0.02 | (0.88) | 0.02  | (0.87) | 0.03  | (0.81) | 0.11  | (0.43) | 0.15  | (0.30) | 0.12  | (0.40) |
| Dry matter intake per metabolic BW [kg DM/ BW <sup>0.75</sup> ]           | 0.27  | (0.06) | 0.04  | (0.81) | 0.04  | (0.75) | -0.14 | (0.32) | -0.15 | (0.30) | -0.08 | (0.60) | 0.28  | (0.04) | 0.19  | (0.17) |
| Energy intake per metabolic BW [MJ NE <sub>L</sub> / BW <sup>0.75</sup> ] | 0.28  | (0.04) | 0.05  | (0.72) | 0.05  | (0.71) | -0.17 | (0.24) | -0.16 | (0.25) | -0.07 | (0.60) | 0.27  | (0.05) | 0.18  | (0.19) |
| Energy balance [MJ NE <sub>L</sub> ]                                      | 0.16  | (0.27) | -0.02 | (0.89) | 0.06  | (0.68) | -0.23 | (0.11) | -0.07 | (0.62) | -0.15 | (0.30) | 0.02  | (0.91) | -0.01 | (0.96) |
| Maintenance [MJ NE <sub>L</sub> ]                                         | -0.14 | (0.32) | -0.44 | (0.00) | -0.32 | (0.02) | 0.23  | (0.10) | 0.37  | (0.01) | 0.41  | (0.00) | -0.23 | (0.09) | -0.10 | (0.46) |
| Milk [MJ NE <sub>L</sub> ]                                                | 0.00  | (0.99) | -0.01 | (0.92) | -0.02 | (0.87) | 0.11  | (0.42) | 0.09  | (0.53) | 0.16  | (0.26) | 0.17  | (0.22) | 0.13  | (0.37) |
| BCS                                                                       | -0.07 | (0.61) | -0.31 | (0.03) | -0.26 | (0.06) | 0.09  | (0.55) | 0.29  | (0.04) | 0.22  | (0.12) | -0.16 | (0.26) | -0.13 | (0.38) |
| Delta body weight                                                         | 0.10  | (0.47) | -0.02 | (0.87) | -0.10 | (0.49) | 0.02  | (0.91) | 0.07  | (0.62) | 0.02  | (0.89) | 0.02  | (0.86) | -0.03 | (0.82) |
| Delta BCS                                                                 | 0.22  | (0.12) | -0.24 | (0.09) | -0.18 | (0.21) | -0.01 | (0.92) | 0.09  | (0.52) | 0.00  | (0.99) | -0.20 | (0.15) | -0.20 | (0.16) |
